# Supplementary material for: Palaeoclimatic and ecological determinants of mammalian host–pathogen exposure in Neanderthal-associated sites across Eurasia
Source: Research Square preprint supplement (doi:10.21203/rs.3.rs-8718874/v1), 2026-02-02
Supplement: Supplementary file 1 [file 1ec77be9f8b7b871c22e55ea.docx]

**Supplementary Table 1**. The main data of the studied Neanderthal remains-bearing sites and stratum.

| **Site, stratum** | **Region** | **Human species** | **Age of stratum** | **Coordinate** |
| --- | --- | --- | --- | --- |
| Dederiyeh Cave Layer 1 | Levant (Syria) | *Homo neanderthalensis* | 90-50 kyr BP | 36.4 N, 36.867 E |
| Dederiyeh Cave Layer 3 | Levant (Syria) | *Homo neanderthalensis* | 90-50 kyr BP | 36.4 N, 36.867 E |
| Ras el-Kelb, Tunnel Trench  Unit K | Levant (Lebanon) | *Homo neanderthalensis* | 120-47 kyr BP | 33.953 N, 35.594 E |
| Ksar Akil XXV | Levant (Lebanon) | *Homo neanderthalensis* | 47-36.52 kyr BP | 33.914 N, 35.641 E |
| Amud Cave B1 | Levant (Israel) | *Homo neanderthalensis* | 61.3-46.0 kyr BP | 32.872 N, 35.502 E |
| Amud Cave B2 | Levant (Israel) | *Homo neanderthalensis* | 70-52 kyr BP | 32.872 N, 35.502 E |
| Amud Cave B4 | Levant (Israel) | *Homo neanderthalensis* | 81-59 kyr BP | 32.872 N, 35.502 E |
| Tabun C | Levant (Israel) | *Homo neanderthalensis* | 195-104 kyr BP | 32.671 N, 34.966 E |
| Subalyuk Layer 11 | Central Europe (Hungary) | *Homo neanderthalensis* | 34.336-31.230 kyr BP | 47.963 N, 20.531 E |
| Vindija G1+2 | Central Europe (Croatia) | *Homo neanderthalensis* | 49-36.18 kyr BP | 46.302 N, 16.08 E |
| Vindija G3 | Central Europe (Croatia) | *Homo neanderthalensis* | 49.00-36.18 kyr BP | 46.302 N, 16.08 E |
| Krapina Layer I | Central Europe (Croatia) | *Homo neanderthalensis* | 126-120 kyr BP | 46.166 N, 15.863 E |
| Kalamakia Unit IV | Greece | *Homo neanderthalensis* | 115-50 kyr BP | 36.677 N, 22.365 E |
| Bordu Mare Cave, Couche III | Romania | *Homo neanderthalensis* | 46.4-36.3 kyr BP | 45.517 N, 23.117 E |
| Fumane A3 | Italy | *Homo neanderthalensis* | 43.6-41.2 kyr BP | 45.592 N, 10.905 E |
| Fumane A9 | Italy | *Homo neanderthalensis* | 48.0-44.8 kyr BP | 45.592 N, 10.905 E |
| Riparo Tagliente 36–37 | Italy | *Homo neanderthalensis* | 70-42 kyr BP | 45.541 N, 11.001 E |
| Cova Negra 2–2B | Spain | *Homo neanderthalensis* | 174 kyr BP | 38.982 N, 0.533 W |
| Cova del Gegant 3a | Spain | *Homo neanderthalensis* | 51.1-47.5 kyr BP | 41.224 N, 1.774 E |
| Saint-Césaire EJOP sup | France | *Homo neanderthalensis* | 39.0-33.6 kyr BP | 45.75 N, 0.504 W |
| Le Moustier Unit J | France | *Homo neanderthalensis* | 42.9-37.7 kyr BP | 44.994 N, 1.06 E |
| La Ferrassie C/D | France | *Homo neanderthalensis* | 48.1-37.4 kyr BP | 44.952 N, 0.938 E |
| Combe-Grenal 23 | France | *Homo neanderthalensis* | 71-57 kyr BP | 44.806 N, 1.226 E |
| Combe-Grenal 35 | France | *Homo neanderthalensis* | 71-57 kyr BP | 44.806 N, 1.226 E |
| Hortus Phase II | France | *Homo neanderthalensis* | 71-29 kyr BP | 43.794 N, 3.835 E |
| Hortus Phase IVa–b | France | *Homo neanderthalensis* | 71-29 kyr BP | 43.794 N, 3.835 E |
| Ciota Ciara Unit 14 | Italy | *Homo neanderthalensis* | 400-250 kyr BP | 45.708 N, 8.278 E |
| Spy 3rd Oss. Horizon | Belgium | *Homo neanderthalensis* | 43.5-37.0 kyr BP | 50.48 N, 4.674 E |
| Feldhofer Grotte Layer 1 | Germany | *Homo neanderthalensis* | 38.57-30.00 kyr BP | 51.227 N, 6.946 E |
| Kulna Layer 7a | Czechia | *Homo neanderthalensis* | 75.09-43.40 kyr BP | 49.408 N, 16.738 E |
| Grotta Guattari Layer 1 | Italy | *Homo neanderthalensis* | 80-55 kyr BP | 41.232 N, 13.096 E |
| Chagyrskaya 6c/1 | Siberia | *Homo neanderthalensis*; *Homo neanderthalensis* | 52.00-45.19 kyr BP | 51.422 N, 83.126 E |
| Chagyrskaya 6a | Siberia | *Homo neanderthalensis*, *Homo neanderthalensis* | 52.00-45.19 kyr BP | 51.422 N, 83.126 E |
| Zaskalnaya VI III+IIIa | Crimea | *Homo neanderthalensis* | 42-30 kyr BP | 45.16 N, 34.66 E |
| Sakajia 3b | Caucasus (Georgia) | *Homo neanderthalensis* | 47.90-39.0 kyr BP | 42.28 N, 42.757 E |
| Sakajia 3d | Caucasus | *Homo neanderthalensis* | 126.0-45.7 kyr BP | 42.28 N, 42.757 E |
| Shanidar D | Iraq (Zagros) | *Homo neanderthalensis* | 54.0-44.5 kyr BP | 36.833 N, 44.22 E |
| Teshik-Tash I–V | Uzbekistan | *Homo neanderthalensis* | 100-40 kyr BP | 38.289 N, 67.047 E |
| Rozhok I VI | Ukraine | *Homo neanderthalensis* | 56.80-32.23 kyr BP | 47.217 N, 38.917 E |
| El Sidrón III | Spain | *Homo neanderthalensis* | 33.1-27.7 kyr BP | 43.384 N, 5.329 W |
| Scladina Unit 4 | Belgium | *Homo neanderthalensis* | 126-57 kyr BP | 50.484 N, 5.025 E |
| Denisova East Chamber’s Layer 12.3 | Siberia | *Homo neanderthalensis*, *Homo neanderthalensis*, *Homo sp.* (Neanderthal/Denisovan offspring, *Homo sp.* (Neanderthal/Denisovan offspring) | 151-131 kyr BP | 51.398 N, 84.678 E |
