# Supplementary material for: Palaeoclimatic and ecological determinants of mammalian host–pathogen exposure in Neanderthal-associated sites across Eurasia
Source: Research Square preprint supplement (doi:10.21203/rs.3.rs-8718874/v1), 2026-02-02
Supplement: Supplementary file 2 [file 38cac09027dae8dea29309df.docx]

**Supplementary Table 4**. The analysed mammal taxa.

| **Family** | **Mammal taxa** | **Abbreviation** | **Citation to pathogens** |
| --- | --- | --- | --- |
| **Bovidae** | *Bison priscus* | *BiPr* | Hubálek and Rudolf (2010) |
| *Bos primigenius* | *BoPr* | Hubálek and Rudolf (2010) |
| *Capra aegagrus* | *CaAe* | Zerek et al. (2025) |
| *Capra ibex* | *CaIb* | Garin-Bastuji et al. (2014), Lambert et al. (2021) |
| *Capra caucasica* | *CaCa* | Hrnková et al. (2021) |
| *Capra pyrenaica* | *CaPy* | Astorga Márquez et al. (2014) |
| *Capra sibirica* | *CaSi* | Esson et al. (2019) |
| *Gazella gazella* | *GaGa* | Hussein et al. (2012) |
| *Gazella subgutturosa* | *GaSu* | Memarian et al. (2015); Hussein et al. (2012) |
| *Ovis ammon* | *OvAm* | Hubálek and Rudolf (2010); Wu et al. (2020); Dong et al. (2018) |
| *Rupicapra rupicapra* | *RuRu* | Hubálek and Rudolf (2010) |
| *Saiga tatarica* | SaTa | Orynbayev et al. (2016) |
| **Canidae** | *Canis lupus* | *CaLu* | Hubálek and Rudolf (2010) |
| *Cuon alpinus* | *CuAl* | Mani et al. (2021) |
| *Vulpes corsak* | *VuCo* | Hubálek and Rudolf (2010) |
| *Vulpes lagopus* | *VuLa* | Fuglei et al. (2008); Mørk et al. (2011) |
| *Vulpes vulpes* | *VuVu* | Millán et al. (2009) |
| **Camelidae** | *Camelus* sp. | Camelus | Hubálek and Rudolf (2010) |
| **Castoridae** | *Castor fiber* | *CaFi* | Hubálek and Rudolf (2010) |
| **Cervidae** | *Alces alces* | *AlAl* | Hubálek and Rudolf (2010) |
| *Capreolus capreolus* | *CaCa* | Hubálek and Rudolf (2010) |
| *Cervus elaphus* | *CeEl* | Hubálek and Rudolf (2010) |
| *Dama dama* | *DaDa* | Hubálek and Rudolf (2010) |
| *Rangifer tarandus* | *RaTa* | Hubálek and Rudolf (2010) |
| **Cricetidae** | *Alticola strelzovi* | *AlSt* | Hubálek and Rudolf (2010) |
| *Arvicola sapidus* | *ArSa* | Schlegel et al. (2012) |
| *Arvicola amphibius* | *ArAm* | Schlegel et al. (2012) |
| *Chionomys nivalis* | *ChNi* | Erdin et al. (2024) |
| *Dinaromys bogdanovi* | *DiBo* | Lukač et al. (2017) |
| *Lagurus lagurus* | *LaLa* | Hubálek and Rudolf (2010) |
| *Lemmus lemmus* | *LeLe* | Hubálek and Rudolf (2010) |
| *Lemmus sibiricus* | *LeSi* | Hubálek and Rudolf (2010) |
| *Microtus arvalis* | *MiAr* | Hubálek and Rudolf (2010) |
| *Microtus agrestis* | *MiAg* | Hubálek and Rudolf (2010) |
| *Microtus guentheri* | *MiGu* | Laakkonen et al. (2006) |
| *Microtus gregalis* | *MiGr* | Hubálek and Rudolf (2010) |
| *Microtus hyperboreus* | *MiHy* | Hubálek and Rudolf (2010) |
| *Microtus subterraneus* | *MiSu* | Hubálek and Rudolf (2010) |
| **Dipodidae** | *Allactaga sp.* | *Allactaga* | Hubálek and Rudolf (2010) |
| *Allactaga major* | *AlMa* | Hubálek and Rudolf (2010) |
| **Sminthidae** | *Sicista betulina* | *SiBe* | Hubálek and Rudolf (2010) |
| **Equidae** | *Equus africanus asinus* | *EqAfAs* | Machacova et al. (2014); Haridy et al. (2010); Rodrigues et al. (2019); Alshammari et al. (2023); Jokar et al. (2023); Morais et al. (2024) |
| *Equus caballus* | *EqCa* | Hubálek and Rudolf (2010) |
| *Equus ferus* | *EqFe* | Rüegg et al. (2006) |
| *Equus hemionus* | *EqHe* | Bargues et al. (2022); Dubey et al. (2020) |
| **Felidae** | *Felis silvestris* | FeSi | Hubálek and Rudolf (2010) |
| *Lynx lynx* | *LyLy* | Hubálek and Rudolf (2010) |
| *Lynx pardinus* | *LyPa* | Lima et al. (2022); Millán et al. (2009) |
| *Panthera leo* | *PaLe* | Moudgil et al. (2019) |
| *Panthera pardus* | *PaPa* | Namroodi et al. (2016) |
| **Gliridae** | *Glis glis* | *GlGl* | Hubálek and Rudolf (2010) |
| *Dryomys nitedula* | *DrNi* | Andreychev and Boyarova (2020). |
| **Hystricidae** | *Hystrix cristata* | *HyCr* | Hubálek and Rudolf (2010) |
| **Hyaenidae** | *Hyaena hyaena* | *HyHy* | Hubálek and Rudolf (2010) |
| **Hippopotamidae** | *Hippopotamus amphibius* | *HiAm* | Bargues et al. (2022) |
| **Leporidae** | *Lepus europaeus* | *LeEu* | Hubálek and Rudolf (2010) |
| *Lepus tolai* | *LeTo* | Hubálek and Rudolf (2010) |
| *Oryctolagus cuniculus* | *OrCu* | Hubálek and Rudolf (2010) |
| **Muridae** | *Apodemus mystacinus* | *ApMy* | Laakkonen et al. (2006) |
| *Apodemus gr. (Sylvaemus) sylvaticus-flavicollis* | *ApSy+Fl* | Laakkonen et al. (2006) |
| *Apodemus uralensis* | *ApUr* | Hubálek and Rudolf (2010) |
| *Clethrionomys glareolus* | *ClGl* | Hubálek and Rudolf (2010) |
| *Clethrionomys rufocanus* | *ClRuf* | Hubálek and Rudolf (2010) |
| *Clethrionomys rutilus* | *ClRut* | Hubálek and Rudolf (2010) |
| *Cricetulus barabensis* | *CrBa* | Hubálek and Rudolf (2010) |
| *Cricetulus migratorius* | *CrMi* | Hubálek and Rudolf (2010) |
| *Cricetus cricetus* | *CrCr* | Hubálek and Rudolf (2010) |
| *Eliomys quercinus* | *ElQu* | Hubálek and Rudolf (2010) |
| *Ellobius talpinus* | *ElTa* | Hubálek and Rudolf (2010) |
| *Mus macedonicus* | *MuMa* | Erdin et al. (2024) |
| *Rattus turkestanicus* | *RaTu* | Hubálek and Rudolf (2010) |
| **Mustelidae** | *Gulo gulo* | *GuGu* | Hubálek and Rudolf (2010) |
| *Lutra lutra* | *LuLu* | Hubálek and Rudolf (2010) |
| *Mustela erminea* | *MuEr* | Hubálek and Rudolf (2010) |
| *Martes martes* | *MaMa* | Hubálek and Rudolf (2010) |
| *Meles meles* | *MeMe* | Millán et al. (2009) |
| *Mustela nivalis* | *MuNi* | Hubálek and Rudolf (2010) |
| *Mustela putorius* | *MuPu* | Hubálek and Rudolf (2010) |
| **Procaviidae** | *Procavia capensis* | *PrCa* | Hubálek and Rudolf (2010) |
| **Rhinolophidae** | *Rhinolophus ferrumequinum* | *RhFe* | Hubálek and Rudolf (2010) |
| **Sciuridae** | *Sciurus vulgaris* | *ScVu* | Hubálek and Rudolf (2010) |
| *Spermophilus undulatus* | *SpUn* | Hubálek and Rudolf (2010) |
| *Tamias sibiricus* | *TaSi* | Hubálek and Rudolf (2010) |
| **Soricidae** | *Crocidura russula* | *CrRu* | Hubálek and Rudolf (2010) |
| *Crocidura suaveolens* | *CrSu* | Hubálek and Rudolf (2010) |
| *Neomys fodiens* | *NeFo* | Hubálek and Rudolf (2010) |
| *Sorex araneus* | *SoAr* | Hubálek and Rudolf (2010) |
| *Sorex minutus* | *SoMi* | Hubálek and Rudolf (2010) |
| **Spalacidae** | *Myospalax myospalax* | *MyosMy* | Dursahinhan et al. (2023) |
| *Spalax ehrenbergi* | *SpEh* | Dursahinhan et al. (2023) |
| **Suidae** | *Sus scrofa* | *SuSc* | Hubálek and Rudolf (2010) |
| **Talpidae** | *Asioscalops altaica* | *AsAl* | Yashina et al. (2022) |
| *Talpa europaea* | *TaEu* | Hubálek and Rudolf (2010) |
| **Vespertillionidae** | *Barbastella barbastellus* | *BaBa* | Arnaout et al. (2023) |
| *Miniopterus schreibersii* | *MiSc* | Kohl et al. (2021); Muzeniek et al. (2022); Bai et al. (2017) |
| *Myotis myotis* | *MyotMy* | Hubálek and Rudolf (2010) |
| **Ursidae** | *Ursus arctos* | *UrAr* | Hubálek and Rudolf (2010) |
