# Supplementary material for: Palaeoclimatic and ecological determinants of mammalian host–pathogen exposure in Neanderthal-associated sites across Eurasia
Source: Research Square preprint supplement (doi:10.21203/rs.3.rs-8718874/v1), 2026-02-02
Supplement: Supplementary file 4 [file a1d13e922d40c90c67cd3cee.docx]

**Supplementary Table 3**. The applied bioclimatic values for palaeoclimatic analysis.

| **Abbreviation** | **Bioclimatic factor** | **Unit** | **PALEO-PGEM Series file** |
| --- | --- | --- | --- |
| bio1 | Annual Mean Temperature | °C | PALEO-PGEM-Series_bio1_mean.nc |
| bio4 | Temperature Seasonality (standard deviation ×100) | °C | PALEO-PGEM-Series_bio4_mean.nc |
| bio8 | Mean Temperature of Wettest Quarter | °C | PALEO-PGEM-Series_bio8_mean.nc |
| bio9 | Mean Temperature of Driest Quarter | °C | PALEO-PGEM-Series_bio9_mean.nc |
| bio10 | Mean Temperature of Warmest Quarter | °C | PALEO-PGEM-Series_bio10_mean.nc |
| bio11 | Mean Temperature of Coldest Quarter | °C | PALEO-PGEM-Series_bio11_mean.nc |
| bio12 | Annual Precipitation | mm | PALEO-PGEM-Series_bio12_mean.nc |
| bio13 | Precipitation of Wettest Month | mm | PALEO-PGEM-Series_bio13_mean.nc |
| bio14 | Precipitation of Driest Month | mm | PALEO-PGEM-Series_bio14_mean.nc |
| bio15 | Precipitation Seasonality (Coefficient of Variation) | mm | PALEO-PGEM-Series_bio15_mean.nc |
| bio16 | Precipitation of Wettest Quarter | mm | PALEO-PGEM-Series_bio16_mean.nc |
| bio17 | Precipitation of Driest Quarter | mm | PALEO-PGEM-Series_bio17_mean.nc |
| bio18 | Precipitation of Warmest Quarter | mm | PALEO-PGEM-Series_bio18_mean.nc |
| bio19 | Precipitation of Coldest Quarter | mm | PALEO-PGEM-Series_bio19_mean.nc |
