# Supplementary material for: Palaeoclimatic and ecological determinants of mammalian host–pathogen exposure in Neanderthal-associated sites across Eurasia
Source: Research Square preprint supplement (doi:10.21203/rs.3.rs-8718874/v1), 2026-02-02
Supplement: Supplementary file 5 [file e8655ea9219c0f0ca15dca1e.docx]

**Supplementary Table 2**. The explanation of Köppen climatic categories used in the study.

| **Main Köppen type** | **Abbreviation** | **Köppen climate** |
| --- | --- | --- |
| Tropical (megathermal) | Af | Tropical rainforest climate |
| Am | Tropical monsoon climate |
| Aw/As | Tropical wet and dry or savanna climate |
| Dry (arid and semiarid) | BWh | Hot desert climate |
| BWk | Cold desert climate |
| BWn | Mild desert climate |
| BSh | Hot semi-arid climate |
| BSk | Cold semi-arid climate |
| BSn | Mild semi-arid climate |
| Temperate (mesothermal) | Cfa | Humid subtropical climate |
| Cfb | Temperate oceanic climate |
| Cfc | Subpolar oceanic climate |
| Cwa | Monsoon-influenced humid subtropical climate |
| Cwb | Subtropical highland climate or temperate oceanic climate with dry winters |
| Cwc | Cold subtropical highland climate or subpolar oceanic climate with dry winters |
| Csa | Hot-summer Mediterranean climate |
| Csb | Warm-summer Mediterranean climate |
| Csc | Cool-summer Mediterranean climate |
| Continental (microthermal) | Dfa | Hot-summer humid continental climate |
| Dfb | Warm-summer humid continental climate |
| Dfc | Subarctic climate |
| Dfd | Extremely cold subarctic climate |
| Dwa | Monsoon-influenced hot-summer humid continental climate |
| Dwb | Monsoon-influenced warm-summer humid continental climate |
| Dwc | Monsoon-influenced subarctic climate |
| Dwd | Monsoon-influenced extremely cold subarctic climate |
| Dsa | Hot, dry-summer continental climate |
| Dsb | Warm, dry-summer continental climate |
| Dsc | dry-summer subarctic climate |
| Dsd | Extremely cold, dry-summer subarctic climate |
| Polar and alpine (montane) | ET | Tundra climate |
| EF | Ice cap climate |
