# Supplementary material for: Palaeoclimatic and ecological determinants of mammalian host–pathogen exposure in Neanderthal-associated sites across Eurasia
Source: Research Square preprint supplement (doi:10.21203/rs.3.rs-8718874/v1), 2026-02-02
Supplement: Supplementary file 6 [file edbe76b1d6084abaf59f01f8.docx]

**Supplementary Table S6**. Predicted top-1 and top-2 arthropod vectors at Neanderthal-associated sites based on k-NN analysis.

| **Site No** | **Site, stratum** | **Top-1 Predicted Vector** | **Top-2 Predicted Vector** |
| --- | --- | --- | --- |
| 1 | Dederiyeh Cave Layer 1 | *Phlebotomus* | *Chrysomyia* |
| 2 | Dederiyeh Cave Layer 3 | *Phlebotomus* | *Chrysomyia* |
| 3 | Ras el-Kelb, Tunnel Trench Unit K | *Phlebotomus* | *Chrysomyia* |
| 4 | Ksar Akil XXV | *Phlebotomus* | *Chrysomyia* |
| 5 | Amud Cave B1 | *Phlebotomus* | *Chrysomyia* |
| 6 | Amud Cave B2 | *Phlebotomus* | *Chrysomyia* |
| 7 | Amud Cave B4 | *Phlebotomus* | *Chrysomyia* |
| 8 | Tabun C | *Phlebotomus* | *Hyalomma* |
| 9 | Subalyuk Layer 11 | *Phlebotomus* | *Dermacentor* |
| 10 | Vindija G1+2 | *Phlebotomus* | *Dermacentor* |
| 11 | Vindija G3 | *Phlebotomus* | *Dermacentor* |
| 12 | Krapina Layer I | *Phlebotomus* | *Chrysomyia* |
| 13 | Kalamakia Unit IV | *Phlebotomus* | *Chrysomyia* |
| 14 | Bordu Mare Cave, Couche III | *Dermacentor* | *Ixodes* |
| 15 | Fumane A3 | *Ixodes* | *Phlebotomus* |
| 16 | Fumane A9 | *Ixodes* | *Chrysomyia* |
| 17 | Riparo Tagliente 36–37 | *Phlebotomus* | *Lymnaea* |
| 18 | Cova Negra 2–2B | *Hyalomma* | *Chrysomyia* |
| 19 | Cova del Gegant 3a | *Phlebotomus* | *Dermacentor* |
| 20 | Saint-Césaire EJOP sup | *Phlebotomus* | *Dermacentor* |
| 21 | Le Moustier Unit J | *Phlebotomus* | *Ixodes* |
| 22 | La Ferrassie C/D | *Phlebotomus* | *Hyalomma* |
| 23 | Combe-Grenal 23 | *Phlebotomus* | *Dermacentor* |
| 24 | Combe-Grenal 35 | *Phlebotomus* | *Dermacentor* |
| 25 | Hortus Phase II | *Tabanus* | *Phlebotomus* |
| 26 | Hortus Phase IVa–b | *Tabanus* | *Phlebotomus* |
| 27 | Ciota Ciara Unit 14 | *Phlebotomus* | *Chrysomyia* |
| 28 | Spy 3rd Oss. Horizon | *Ixodes* | *Dermacentor* |
| 29 | Feldhofer Grotte Layer 1 | *Ixodes* | *Phlebotomus* |
| 30 | Kulna Layer 7a | *Ixodes* | *Tabanus* |
| 31 | Grotta Guattari Layer 1 | *Hyalomma* | *Phlebotomus* |
| 32 | Chagyrskaya 6c/1 | *Ixodes* | *None* |
| 33 | Chagyrskaya 6a | *Ixodes* | *None* |
| 34 | Zaskalnaya VI III+IIIa | *Phlebotomus* | *Dermacentor* |
| 35 | Sakajia 3b | *Phlebotomus* | *Dermacentor* |
| 36 | Sakajia 3d | *Dermacentor* | *Phlebotomus* |
| 37 | Shanidar D | *Hyalomma* | *Chrysomyia* |
| 38 | Teshik-Tash I–V | *Hyalomma* | *None* |
| 39 | Rozhok I VI | *Dermacentor* | *Phlebotomus* |
| 40 | El Sidrón III | *Dermacentor* | *Phlebotomus* |
| 41 | Scladina Unit 4 | *Ixodes* | *Phlebotomus* |
| 42 | Denisova East Chamber’s Layer 12.3 | *Ixodes* | *None* |
