# Supplementary material for: Palaeoclimatic and ecological determinants of mammalian host–pathogen exposure in Neanderthal-associated sites across Eurasia
Source: Research Square preprint supplement (doi:10.21203/rs.3.rs-8718874/v1), 2026-02-02
Supplement: Supplementary file 7 [file f8d0bd34aec7272429089a5d.docx]

**Supplementary Table 4**. The details of the occurrence data of the selected zoonotic host and vector invertebrate taxa.

| **Mosquito species** | **Subgenus** | **Causative agent, vector role** | **DOI** |
| --- | --- | --- | --- |
| *Chrysomya* | Old World blow fly | myasis | https://doi.org/10.15468/dl.y8j9va |
| *Dermacentor* | hard tick | *Anaplasma*, *Babesia*, *Coxiella*, *Francisella*, *Rickettsia*, arboviruses | https://doi.org/10.15468/dl.gfq5ts |
| *Hyalomma* | hard tick | CCHF virus, *Coxiella burnettii*, *Rickettsia sibirica* | https://doi.org/10.15468/dl.jkwnz4 |
| *Ixodes* | hard tick | *Anaplasma*, *Babesia*, *Borrelia*, Flavivirus TBE | https://doi.org/10.15468/dl.zhv92v |
| *Lymnaea* | freshwater snail | trematodes | https://doi.org/10.15468/dl.pxvq8p |
| *Phlebotomu*s | sand fly | *Leishmania*, *Phleboviruses* | https://doi.org/10.15468/dl.upk85u |
| *Tabanus* | fly | *Francisella tularensis*, passive transport of enteral pathogens | https://doi.org/10.15468/dl.bhjpgz |
